# Supplementary material
Source: Springer Nature journal article supplement (https://www.springermedizin.de/resource/supplementary/12936_2006_331_MOESM9_ESM.pdf/9547566)
Supplement: MOESM9 [file 9547566]

|                                                 | specimens collected | 18h-19h | 19h-20h | 20h-21h | 21h-22h | 22h-23h | 23h-24h | 00h-01h | 01h-02h | 02h-03h | 03h-04h | 04h-05h | 05h-06h | Description                 |
|-------------------------------------------------|---------------------|---------|---------|---------|---------|---------|---------|---------|---------|---------|---------|---------|---------|-----------------------------|
| <b>An. dirus s.s.</b>                           |                     |         |         |         |         |         |         |         |         |         |         |         |         |                             |
| Site 223 [3]                                    | 1281                |         |         |         |         |         |         |         |         |         |         |         |         | OH (Sep 84, Apr, Sep 85)    |
| Site 235 [43]                                   | 161                 |         |         |         |         |         |         |         |         |         |         |         |         | OH                          |
|                                                 | 193                 |         |         |         |         |         |         |         |         |         |         |         |         | IH                          |
| <b>An. dirus s.l. ( probably An.dirus s.s.)</b> |                     |         |         |         |         |         |         |         |         |         |         |         |         |                             |
| Site 336 [112]                                  |                     |         |         |         |         |         |         |         |         |         |         |         |         |                             |
| Site 276 [64]                                   | 532                 | -       |         |         |         |         |         |         |         |         |         |         |         | IH                          |
|                                                 |                     | -       |         |         |         |         |         |         |         |         |         |         |         | OH                          |
| Site 282 [27]                                   | 104                 |         |         |         |         |         |         |         |         |         |         |         |         | HC (Aug-Sep 2000)           |
| <b>An. crascens</b>                             |                     |         |         |         |         |         |         |         |         |         |         |         |         |                             |
| Site 173 [3]                                    | 120                 |         |         |         |         |         |         |         |         |         |         |         |         | OH (Feb 85, Oct 87)         |
| <b>An. scanloni</b>                             |                     |         |         |         |         |         |         |         |         |         |         |         |         |                             |
| Site 175 [3]                                    | 109                 |         |         |         |         |         |         |         |         |         |         |         |         | OH (Dec 85, Nov 86)         |
| <b>An. baimaii</b>                              |                     |         |         |         |         |         |         |         |         |         |         |         |         |                             |
| Site 12 [59]                                    | 5181                | -       |         |         |         |         |         |         |         |         |         |         |         | IH (year 1975)              |
|                                                 |                     | -       |         |         |         |         |         |         |         |         |         |         |         | IH (year 1976)              |
|                                                 |                     | -       |         |         |         |         |         |         |         |         |         |         |         | OH (year 1975)              |
|                                                 |                     | -       |         |         |         |         |         |         |         |         |         |         |         | OH (year 1976)              |
|                                                 |                     |         |         |         |         |         |         |         |         |         |         |         |         | OH First quarter (year 76)  |
|                                                 |                     |         |         |         |         |         |         |         |         |         |         |         |         | OH Full moon (year 76)      |
|                                                 |                     |         |         |         |         |         |         |         |         |         |         |         |         | OH Last quarter (year 76)   |
|                                                 |                     |         |         |         |         |         |         |         |         |         |         |         |         | OH New Moon (year 76)       |
|                                                 |                     | -       |         |         |         |         |         |         |         |         |         |         |         | OH New Moon (Jul 76)        |
|                                                 |                     | -       |         |         |         |         |         |         |         |         |         |         |         | OH First quarter (Jul 76)   |
|                                                 |                     | -       |         |         |         |         |         |         |         |         |         |         |         | OH Full moon (Jul 76)       |
|                                                 |                     | -       |         |         |         |         |         |         |         |         |         |         |         | OH Last quarter (Jul 76)    |
| Site112[57]                                     | 147                 |         |         |         |         |         |         |         |         |         |         |         |         | HC                          |
| Site 178 [3]                                    | 128                 |         |         |         |         |         |         |         |         |         |         |         |         | OH (Nov 86)                 |
| <b>An.dirus s.l. ( probably An. baimaii)</b>    |                     |         |         |         |         |         |         |         |         |         |         |         |         |                             |
| Site 13 [70]                                    | 544                 |         |         |         |         |         |         |         |         |         |         |         |         | CDC/IH (Jul 84)             |
| Site 17 [56]                                    |                     |         |         |         |         |         |         |         |         |         |         |         |         | No info                     |
| Site 17 [99]                                    | 104                 |         |         |         |         |         |         |         |         |         |         |         |         | HC                          |
| <b>An.dirus s.l.</b>                            |                     |         |         |         |         |         |         |         |         |         |         |         |         |                             |
| Site 191 [71]                                   | 31                  |         |         |         |         |         |         |         |         |         |         |         |         | HC                          |
| Site 241 [34]                                   |                     | -       |         |         |         |         |         |         |         |         |         |         |         | OH                          |
| Site 257[35]                                    | 35                  |         |         |         |         |         |         |         |         |         |         |         |         | IH and OH                   |
| Site 257[35]                                    | 203                 |         |         |         |         |         |         |         |         |         |         |         |         | HC in forest                |
| Site 257[35]                                    | 295                 |         |         |         |         |         |         |         |         |         |         |         |         | Monkey in the forest canopy |
| Site 217 [63]                                   |                     |         |         |         |         |         |         |         |         |         |         |         |         | IH (May-Aug) prespraying    |
|                                                 |                     |         |         |         |         |         |         |         |         |         |         |         |         | IH (May-Aug) postspraying   |
|                                                 |                     |         |         |         |         |         |         |         |         |         |         |         |         | OH (May-Aug) prespraying    |
|                                                 |                     |         |         |         |         |         |         |         |         |         |         |         |         | OH (May-Aug) postspraying   |
|                                                 |                     |         |         |         |         |         |         |         |         |         |         |         |         | IH (Sep-Oct) prespraying    |
|                                                 |                     |         |         |         |         |         |         |         |         |         |         |         |         | IH (Sep-Oct) postspraying   |
|                                                 |                     |         |         |         |         |         |         |         |         |         |         |         |         | OH (Sep-Oct) prespraying    |
|                                                 |                     |         |         |         |         |         |         |         |         |         |         |         |         | OH (Sep-Oct) postspraying   |

Decreasing intensity (■ >17%, ■ 15-16%, ■ 12-14%, ■ 10-11%, ■ <10%, white: no mosquito, - no data).
